# Supplementary material
Source: Royal Society of Chemistry journal article supplement (doi:10.1039/d6cp00823b)
Supplement: d6cp00823b1.pdf [file d6cp00823b1.pdf]

### Supplementary Materials

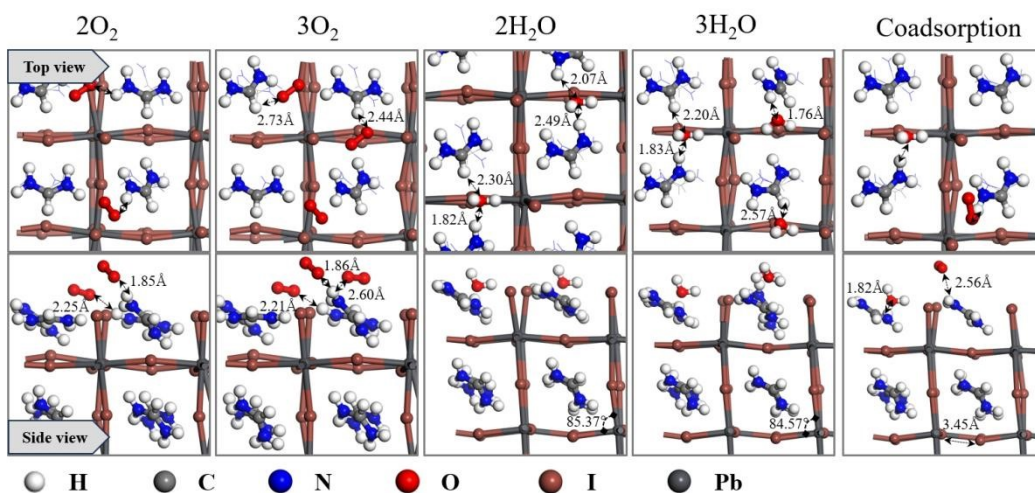

Figure S1. Multi-molecular adsorption of  $\text{H}_2\text{O}$  and  $\text{O}_2$  on the surface of FAIS.

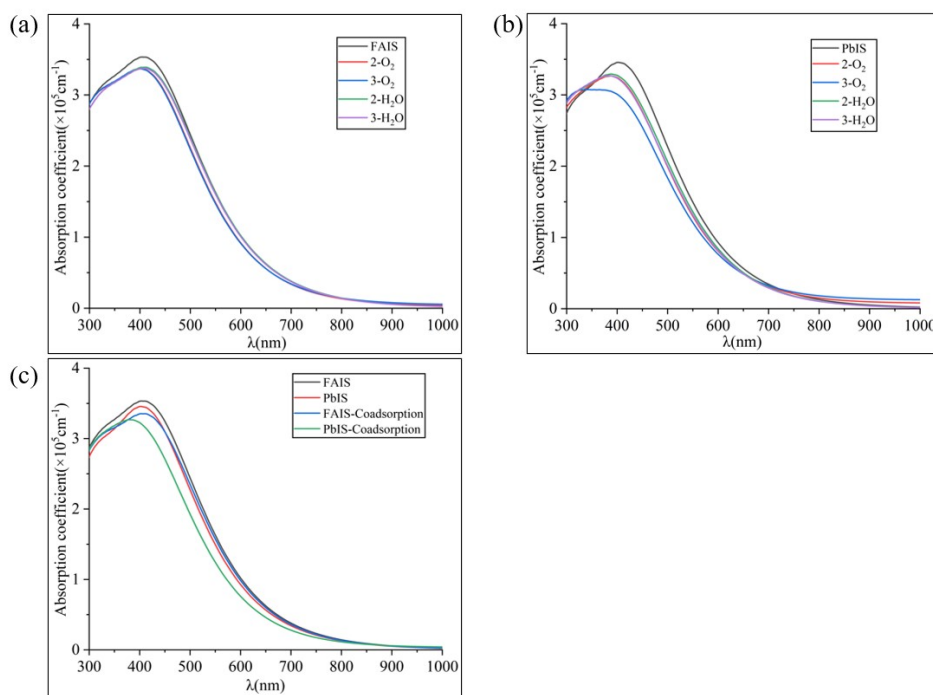

Figure S2. (a) Optical absorption spectra of FAIS and multi-molecular adsorption, (b) Optical absorption spectra of PbIS and multi-molecular adsorption, (c) Optical absorption spectra of FAIS and PbIS and co-adsorption.

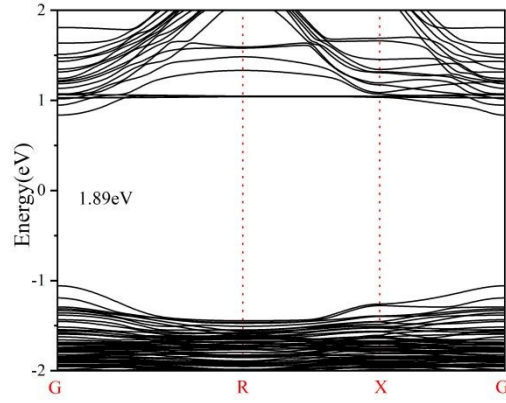

Figure S3. The band gap of three O<sub>2</sub> molecules adsorbed in PbIS.

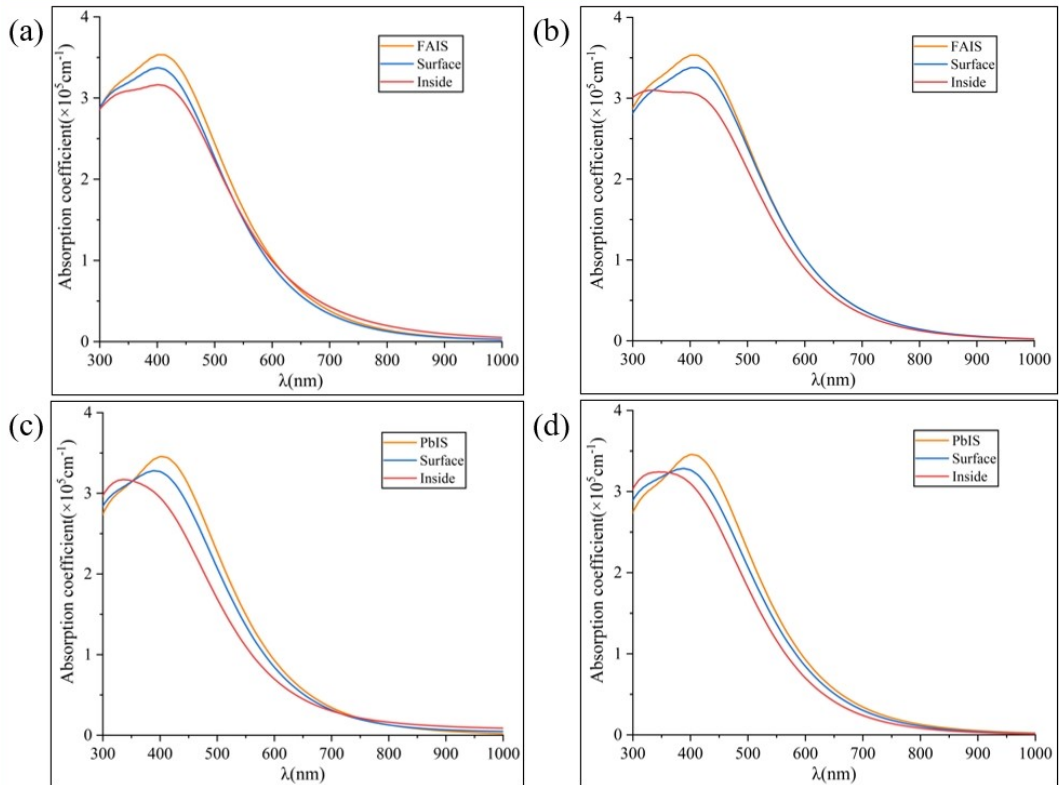

Figure S4. (a) Absorption spectra of O<sub>2</sub> adsorbed on the surface of FAIS and into the interior of FAIS, (b) Absorption spectra of H<sub>2</sub>O adsorbed on the surface of FAIS and into the interior of FAIS, (c) Absorption spectra of O<sub>2</sub> adsorbed on the surface of PbIS and inside PbIS, (d) Absorption spectra of H<sub>2</sub>O adsorbed on the surface of PbIS and into the interior of PbIS.

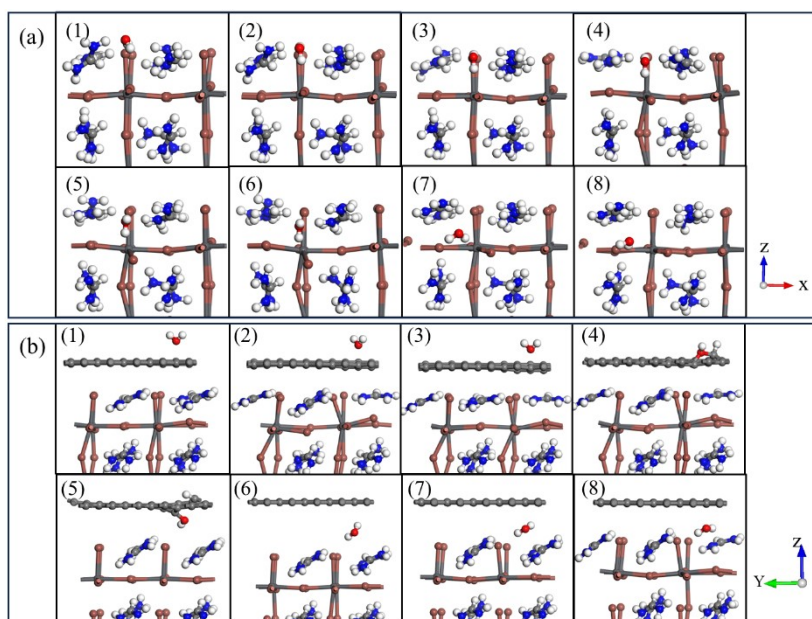

Figure S5. Diffusion paths of H<sub>2</sub>O entering the FAIS surface and the graphene/FAIS hetero-junction.

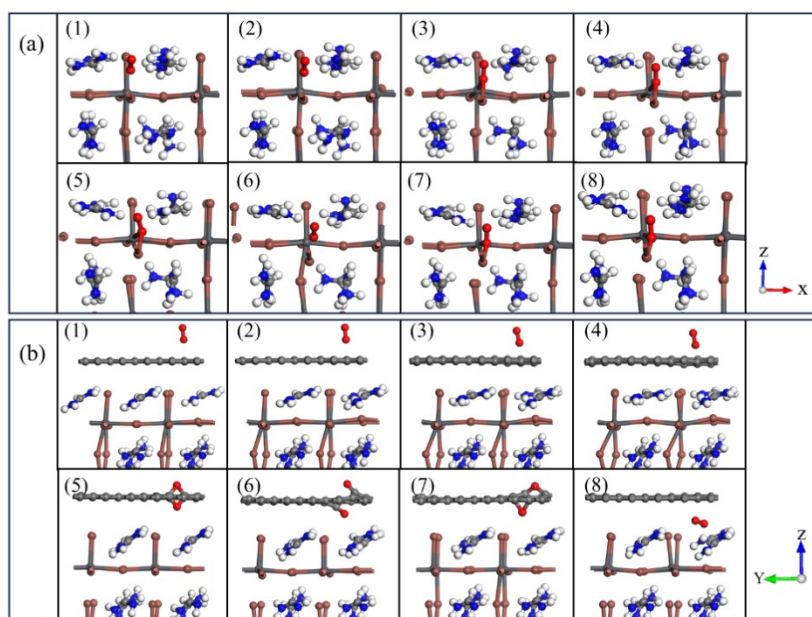

Figure S6. Diffusion paths of O<sub>2</sub> entering the FAIS surface and the graphene/FAIS hetero-junction.

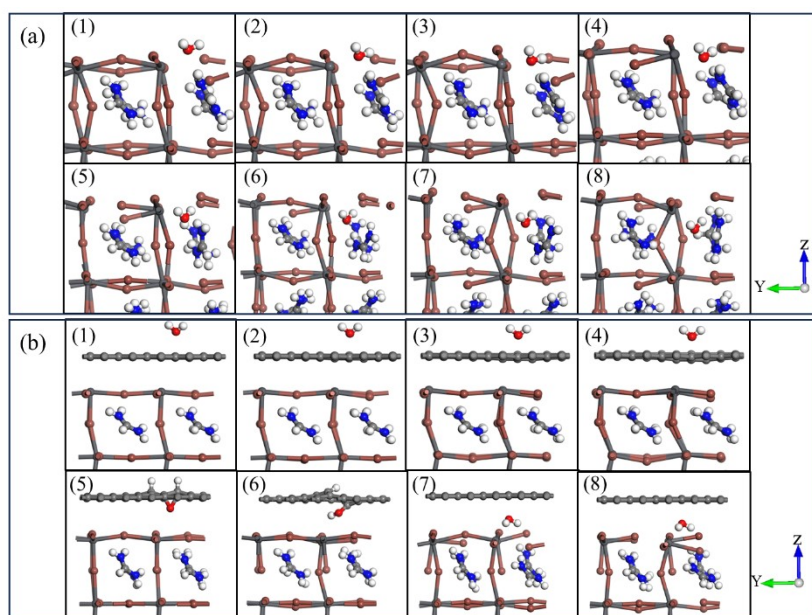

Figure S7. Diffusion paths of H<sub>2</sub>O entering the PbIS surface and the graphene/PbIS hetero-junction.

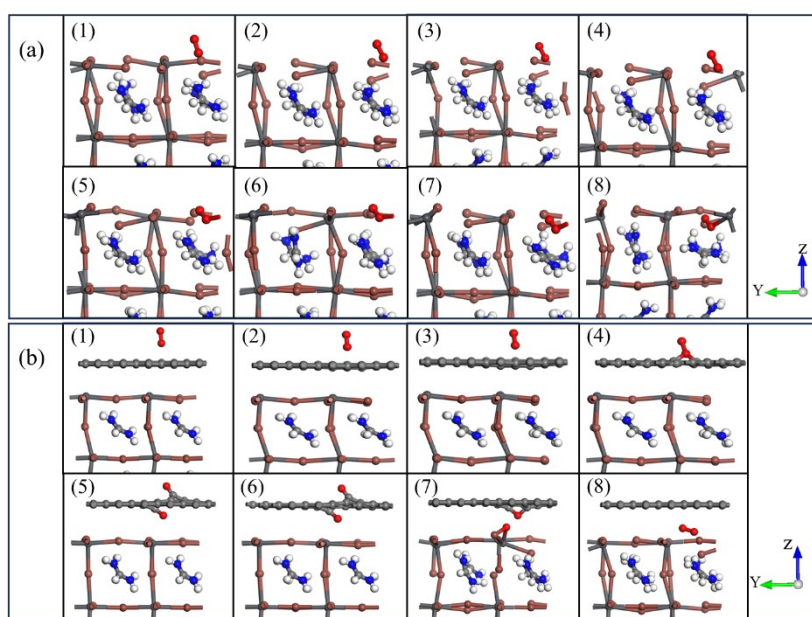

Figure S8. O<sub>2</sub> Diffusion paths of O<sub>2</sub> entering the PbIS surface and the graphene/PbIS hetero-junction.

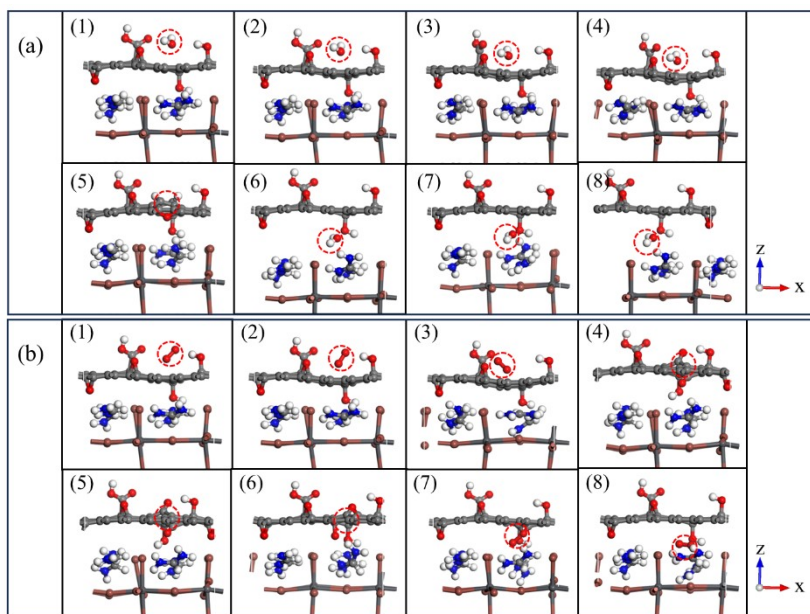

Figure S9. Diffusion paths of H<sub>2</sub>O and O<sub>2</sub> entering the GO/FAIS hetero-junction.

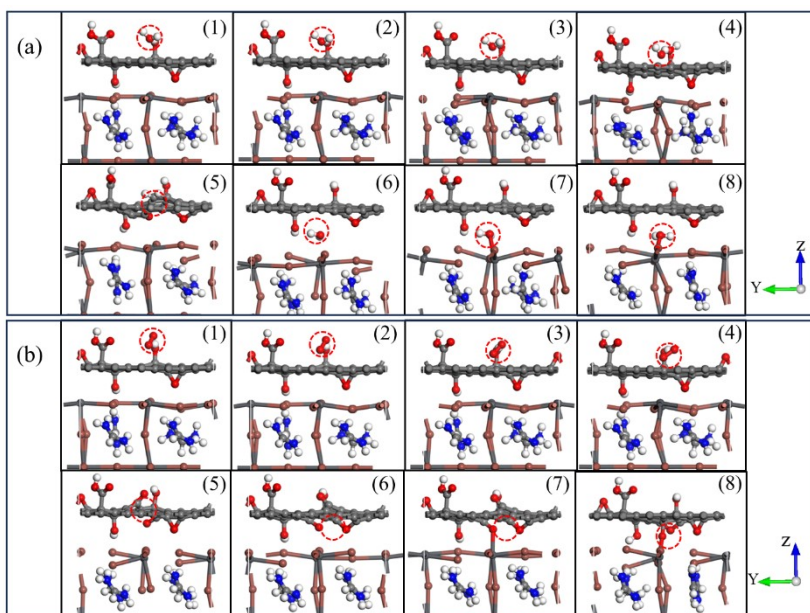

Figure S10. Diffusion paths of H<sub>2</sub>O and O<sub>2</sub> entering the GO/PBIS hetero-junction.

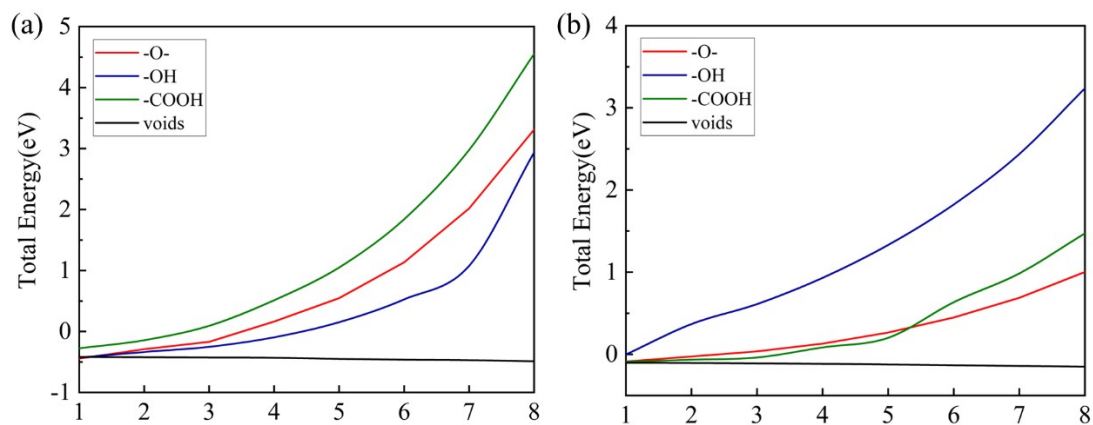

Figure S11. (a) and (b) indicate the Interaction energy of H<sub>2</sub>O and O<sub>2</sub> to GO, respectively. Voids are located in the -O- , -OH and -COOH functional groups and exposed positions away from the functional groups (x-axis 1-8 indicates the number of steps close to the functional group, step size is 0.15Å)

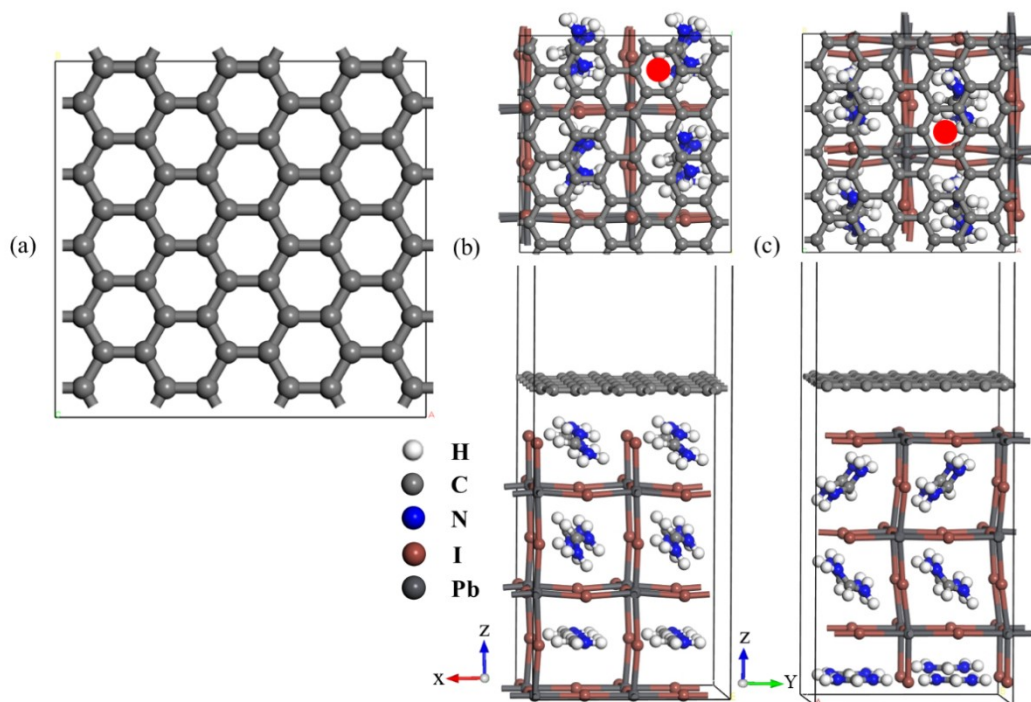

Figure S12. (a) Structure of the graphene sheet. (b) Structure of FAIS/graphene heterojunction. (c) Structure of PbIS/graphene hetero-junction. The specific location of the Void is shown in the red ball markings in Figures (b) and (c).

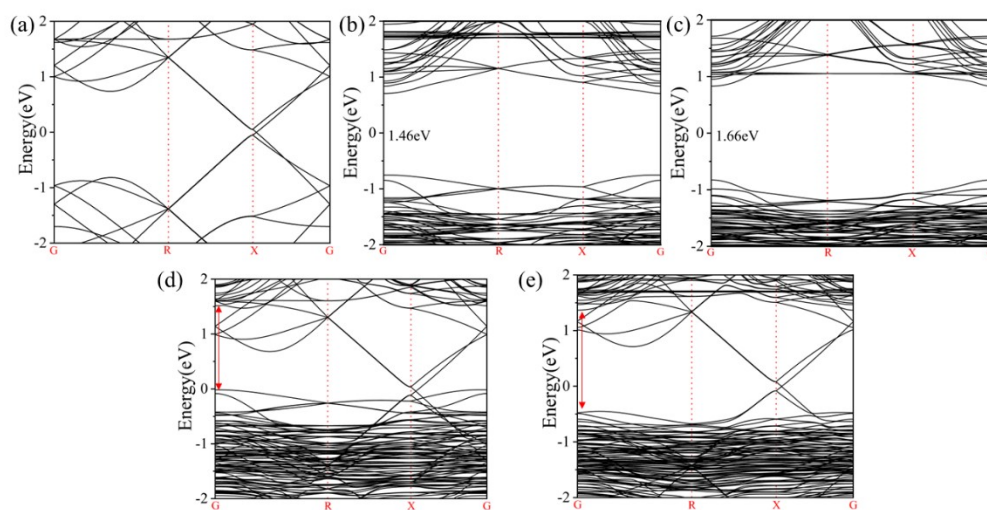

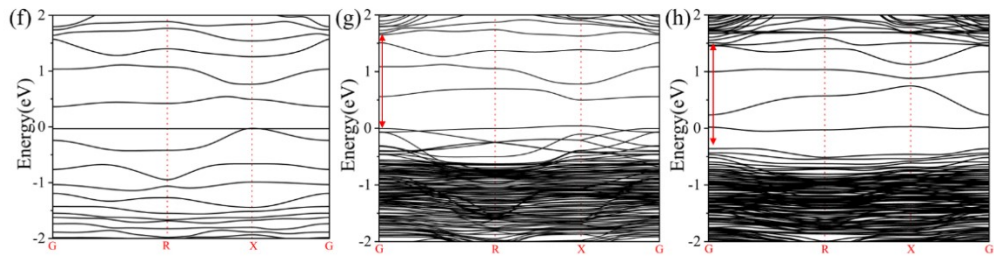

Figure S13. (a) The band structure of graphene, (b-c)The band structures of FAIS and PbIS surfaces, (d-e) the band structures of graphene/FAIS and graphene/PbIS heterojunctions, (f) The band structure of GO, (g-h) the band structures of GO/FAIS and GO/PbIS.
